# Supplementary material for: Retinoic Acid Induced Protein 14 (Rai14) is dispensable for mouse spermatogenesis
Source: PeerJ. 2021 Feb 19;9:e10847. doi: 10.7717/peerj.10847 (PMC7899019; doi:10.7717/peerj.10847)
Supplement: Supplemental Information 1 — Fertility test. [file peerj-09-10847-s001.xlsx]

## Sheet: Sheet1
wt	het	ko	Pups/ Litter
7	12	11
9	8	9
11	9	7
8	7	8
7	7	6
8	6	9
	8	8
		10
